# Supplementary material for: Electrochemical performance of binder-free carbon nanotubes with different nitrogen amounts grown on the nickel foam as cathodes in Li–O2batteries
Source: Royal Society of Chemistry journal article supplement (doi:10.1039/c4ta03457k), 2014-08-19
Supplement: c4ta03457k1.pdf [file c4ta03457k1.pdf]

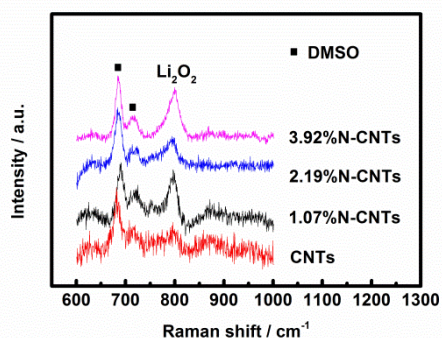

Fig. S1 Raman spectra of four electrodes with different nitrogen amount after the first discharge process.

In order to further identify the composition of the amorphous products on CNTs and N-CNTs electrodes with different nitrogen amount, Raman spectra of the discharge products in the sulfones-based electrolyte were plotted in Fig. S1. One symmetric peak was observed around 795 cm<sup>-1</sup>, which is attributed to the existence of Li<sub>2</sub>O<sub>2</sub>, meanwhile the typical peaks of DMSO at 685 and 717 cm<sup>-1</sup> are also detected. These observations indicate that the discharge products are mainly composed of Li<sub>2</sub>O<sub>2</sub> in sulfones-based electrolyte.

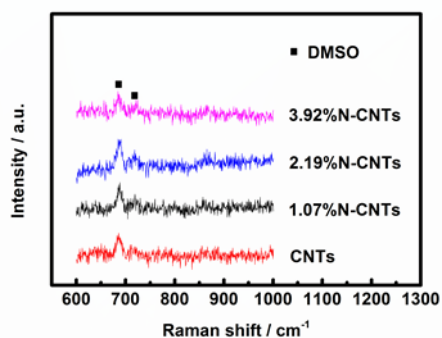

Fig. S2 Raman spectra of four electrodes with different nitrogen amount after the first charge process.

Meanwhile, after the charge process, no obvious peak around 795 cm<sup>-1</sup> was detected in all samples, which indicated that most of Li<sub>2</sub>O<sub>2</sub> has been decomposed after the charge process, as shown in Fig. S2.
